# Supplementary material for: Alkaloid defenses of co-mimics in a putative Müllerian mimetic radiation
Source: PubMed Central journal article supplement (PMC4101839; doi:10.1186/1471-2148-14-76), 2014-04-04
Supplement: 1471-2148-14-76-S1.pdf [file 1471-2148-14-76-S1.pdf]

**Appendix 1.** Occurrence of alkaloids in skin extracts of individual *Ranitomeya imitator*, *Ranitomeya variabilis*, *Ranitomeya fantastica*, and *Ranitomeya summersii* arranged by mimetic location. Alkaloid quantities are as follows: **major alkaloids** (> 50 µg per skin), **minor alkaloids** (5-50 µg per skin), and **trace alkaloids** (< 5 µg per skin). The number in parentheses following an entry indicates the number of isomers.

| Location<br>Species                                         | Frog | Alkaloid Quantity | Alkaloids                                                                                                                                                          |
|-------------------------------------------------------------|------|-------------------|--------------------------------------------------------------------------------------------------------------------------------------------------------------------|
|                                                             |      |                   | <b>Ant origin:</b> HTX; DHQ; N-Me-DHQ; 4,6-Q; 3,5-I.<br><b>Mite origin:</b> PTX; DesMe PTX; 5,8-I; 5,6,8-I; 1,4-Q; Unclass.<br><b>Unnown origin:</b> OHQ; Izidine. |
| <b>Tarapoto, San Martin</b><br><i>Ranitomeya imitator</i>   | 1    | Major             | HTX <b>259A, 261A, 283A, 285A</b> ; DHQ <b>243A</b> (4).                                                                                                           |
|                                                             |      | Minor             | HTX <b>235A</b> ; DHQ <b>219A</b> (2), <b>267L</b> ; N-MeDHQ <b>237U</b> ; 4,6-Q <b>195C</b> (2); 3,5-I <b>223AB</b> (3); DesMe PTX <b>249G</b> .                  |
|                                                             |      | Trace             | DHQ <b>249E</b> ; 5,8-I <b>219J</b> ; 5,6,8-I <b>231B</b> .                                                                                                        |
|                                                             | 2    | Major             | HTX <b>235A</b> (3); DHQ <b>219A</b> (5), <b>243A</b> (5).                                                                                                         |
|                                                             |      | Minor             | HTX <b>285A</b> (2), <b>287A</b> ; DHQ <b>221D</b> (2), <b>269AB</b> .                                                                                             |
|                                                             |      | Trace             | HTX <b>259A, 261A, 283A</b> (2); DHQ <b>249E</b> (2); 3,5-I <b>223AB</b> (3); Unclass <b>231I</b> .                                                                |
|                                                             | 3    | Major             | HTX <b>235A</b> (3); DHQ <b>219A</b> (3).                                                                                                                          |
|                                                             |      | Minor             | DHQ <b>221D</b> (2).                                                                                                                                               |
|                                                             |      | Trace             | 5,8-I <b>219J</b> ; Unclass <b>231I</b> .                                                                                                                          |
|                                                             | 4    | Major             | DHQ <b>219A</b> (4), <b>243A</b> (7).                                                                                                                              |
|                                                             |      | Minor             | HTX <b>235A</b> (2), <b>259A</b> ; DHQ <b>223F</b> (2); 3,5-I <b>223AB</b> (3); Unclass <b>231I</b> .                                                              |
|                                                             |      | Trace             | Unclass <b>209G</b> .                                                                                                                                              |
|                                                             | 5    | Major             | DHQ <b>219A</b> (3), <b>243A</b> (6).                                                                                                                              |
|                                                             |      | Minor             | HTX <b>235A</b> (3); DHQ <b>223F</b> ; 3,5-I <b>223AB</b> (3).                                                                                                     |
|                                                             |      | Trace             | HTX <b>259A</b> ; 4,6-Q <b>195C</b> (2); Unclass <b>231I</b> .                                                                                                     |
| <b>Tarapoto, San Martin</b><br><i>Ranitomeya variabilis</i> | 1    | Major             | HTX <b>235A</b> (2).                                                                                                                                               |
|                                                             |      | Minor             | 5,6,8-I <b>239Z</b> (2).                                                                                                                                           |
|                                                             |      | Trace             | HTX <b>283A, 285A</b> ; DHQ <b>219A, 223F</b> .                                                                                                                    |
|                                                             | 2    | Major             |                                                                                                                                                                    |
|                                                             |      | Minor             |                                                                                                                                                                    |
|                                                             |      | Trace             | HTX <b>235A</b> ; DHQ <b>223F, 243A</b> .                                                                                                                          |

|   |                         |                                                                                                                                                    |
|---|-------------------------|----------------------------------------------------------------------------------------------------------------------------------------------------|
| 3 | Major<br>Minor<br>Trace | HTX 259A, 261A, 285A; PTX 267A; 5,6,8-I 231B.<br>HTX 235A(2), 283A; DHQ 221B, 223F, 251A; 4,6-Q 195C; PTX 251D; 5,6,8-I 239Z.                      |
| 4 | Major<br>Minor<br>Trace | HTX 235A(2); PTX 267A.<br>HTX 259A, 261A(2), 283A(3), 285A(2); DHQ 223F; PTX 251D; 5,6,8-I 231B, 239Z(2).<br>DHQ 243A, 251A; 4,6-Q 195C; PTX 237A. |
| 5 | Major<br>Minor<br>Trace | HTX 259A, 285A(2); DHQ 221B, 223F, 243A, 251A; 4,6-Q 195C; PTX 267A; 5,6,8-I 231B.<br>HTX 235A, 261A, 283A; PTX 251D; 5,6,8-I 239Z.                |

---

|                                                                          |   |                         |                                                                                                                    |
|--------------------------------------------------------------------------|---|-------------------------|--------------------------------------------------------------------------------------------------------------------|
| <b>Pongo de Cainarachi,<br/>San Martin</b><br><i>Ranitomeya imitator</i> | 1 | Major<br>Minor<br>Trace | HTX 235A; DHQ 243A(3).<br>HTX 259A, 261A(2), 285A, 291A; DHQ 219A(2), 223Q.<br>DHQ 219A; 3,5-I 253T; 5,6,8-I 237C. |
|                                                                          | 2 | Major<br>Minor<br>Trace | DHQ 219A(4); 243A(2).<br>HTX 235A, 259A, 261A(2), 285A; DHQ 223Q(2); 3,5-I 223AB(2).<br>5,6,8-I 223A, 237C, 239Z.  |
|                                                                          | 3 | Major<br>Minor<br>Trace | HTX 259A; DHQ 223Q, 243A(2).<br>HTX 235A, 261A(2), 285A, 291A; DHQ 219A; 5,6,8-I 223A.                             |
|                                                                          | 4 | Major<br>Minor<br>Trace | HTX 259A, 291A; DHQ 243A(2).<br>HTX 235A, 261A, 285A; DHQ 219A, 223Q; 3,5-I 223AB(2).                              |
|                                                                          | 5 | Major<br>Minor<br>Trace | HTX 259A, 291A; DHQ 223Q(2), 243A(2).<br>HTX 235A, 261A(2), 285A.                                                  |
| <b>Pongo de Cainarachi,<br/>San Martin</b>                               | 1 | Major<br>Minor          | DHQ 219A(2), 223Q; 3,5-I 181A, 223AB(3), 253T(2).                                                                  |

|                                                        |   |                         |                                                                                                                                                                                                                                                                |
|--------------------------------------------------------|---|-------------------------|----------------------------------------------------------------------------------------------------------------------------------------------------------------------------------------------------------------------------------------------------------------|
| <i>Ranitomeya imitator</i>                             |   | Trace                   | HTX <b>235A, 259A</b> ; DHQ <b>249E, 253T</b> .                                                                                                                                                                                                                |
|                                                        | 2 | Major<br>Minor<br>Trace | HTX <b>235A, 259A, 261A</b> .<br>HTX <b>285A, 291A</b> ; DHQ <b>219A, 243A</b> ; 3,5-I <b>223AB(2), 253T</b> .                                                                                                                                                 |
|                                                        | 3 | Major<br>Minor<br>Trace | DHQ <b>223Q</b> .<br>HTX <b>259A</b> ; DHQ <b>219A, 243A</b> ; 4,6-Q <b>195C</b> ; 3,5-I <b>253T</b> ; 5,6,8-I <b>231B</b> ; 1,4-Q <b>231A</b> .                                                                                                               |
|                                                        | 4 | Major<br>Minor<br>Trace | HTX <b>291A</b> ; 3,5-I <b>253T</b> ; 5,6,8-I <b>237C</b> .<br>HTX <b>259A, 261A</b> ; DHQ <b>223Q</b> ; 3,5-I <b>223AB(3)</b> .                                                                                                                               |
|                                                        | 5 | Major<br>Minor<br>Trace | 3,5-I <b>223AB(3)</b> .<br>3,5-I <b>253T</b> ; 5,6,8-I <b>237C</b> .                                                                                                                                                                                           |
| <b>Sauce, San Martin</b><br><i>Ranitomeya imitator</i> | 1 | Major<br>Minor<br>Trace | DHQ <b>243A(3)</b> .<br>HTX <b>259A, 261A, 285A(2), 291A</b> ; 3,5-I <b>223AB(2)</b> ; Unclass <b>209G</b> .<br>DHQ <b>267L, 269AB</b> ; 5,8-I <b>243B</b> ; 1,4-Q <b>257D</b> .                                                                               |
|                                                        | 2 | Major<br>Minor<br>Trace | DHQ <b>243A(3)</b> .<br>3,5-I <b>223AB(3)</b> .<br>HTX <b>259A, 261A, 285A, 291A</b> ; DHQ <b>219A, 267L</b> ; 5,8-I <b>243B</b> ; 1,4-Q <b>257D</b> ; Unclass <b>209G</b> .                                                                                   |
|                                                        | 3 | Major<br>Minor<br>Trace | DHQ <b>243A(4)</b> ; 3,5-I <b>223AB(3)</b> .<br>HTX <b>291A</b> ; DHQ <b>219A, 269AB</b> ; Unclass <b>209G(2)</b> .<br>HTX <b>259A, 261A, 285A</b> ; DHQ <b>267L</b> ; 4,6-Q <b>195G</b> ; 5,8-I <b>243B</b> ; 1,4-Q <b>257D</b> ; Unclass <b>235P, 231I</b> . |
|                                                        | 4 | Major<br>Minor<br>Trace | 3,5-I <b>223AB(3)</b> .<br>HTX <b>291A</b> ; DHQ <b>243A(2), 269AB</b> ; Unclass <b>209G(2)</b> .<br>HTX <b>259A, 285A</b> ; 4,6-Q <b>195G</b> ; 5,8-I <b>243B</b> ; 1,4-Q <b>257D</b> ; Izidine <b>239X(2)</b> ; Unclass <b>235P</b> .                        |
|                                                        | 5 | Major<br>Minor<br>Trace | DHQ <b>219A(3), 243A(4)</b> .<br>3,5-I <b>223AB(3)</b> ; Unclass <b>209G</b> .<br>HTX <b>235A, 259A</b> ; DHQ <b>209J, 267L</b> ; 4,6-Q <b>195G</b> ; 5,6,8-I <b>221P</b> ; 1,4-Q <b>257D</b> ; Unclass <b>231I</b> .                                          |

|                                                         |   |                         |                                                                                                                                                                                                                               |
|---------------------------------------------------------|---|-------------------------|-------------------------------------------------------------------------------------------------------------------------------------------------------------------------------------------------------------------------------|
| <b>Sauce, San Martin</b><br><i>Ranitomeya summersii</i> | 1 | Major<br>Minor<br>Trace | HTX <b>283A, 285A</b> ; 3,5-I <b>223AB</b> ; Unclass <b>209F</b> .                                                                                                                                                            |
|                                                         | 2 | Major<br>Minor<br>Trace | HTX <b>283A, 285A(2)</b> ; 3,5-I <b>223AB(2)</b> ; Unclass <b>209F</b> .                                                                                                                                                      |
|                                                         | 3 | Major<br>Minor<br>Trace | HTX <b>283A, 285A(2)</b> ; 3,5-I <b>223AB(2)</b> .                                                                                                                                                                            |
|                                                         | 4 | Major<br>Minor<br>Trace | DHQ <b>193D</b> .<br>HTX <b>283A, 285A</b> ; 3,5-I <b>223AB(2)</b> .                                                                                                                                                          |
|                                                         | 5 | Major<br>Minor<br>Trace | HTX <b>259A, 283A, 285A</b> .<br>HTX <b>235A</b> ; DHQ <b>243A(2)</b> .<br>HTX <b>261A(2)</b> ; N-Me-DHQ <b>237U</b> ; 3,5-I <b>223AB(2)</b> ; PTX <b>323A</b> ; 5,8-I <b>243B</b> ; 1,4-Q <b>257D</b> ; OHQ <b>193D</b> .    |
| <b>Varadero, Loreto</b><br><i>Ranitomeya imitator</i>   | 1 | Major<br>Minor<br>Trace | DHQ <b>219A(2)</b> .<br>DHQ <b>243A(3)</b> ; 5,6,8-I <b>263D</b> .<br>HTX <b>235A, 259A, 291A</b> ; Unclass <b>209G, 231I</b> .                                                                                               |
|                                                         | 2 | Major<br>Minor<br>Trace | DHQ <b>219A(3)</b> .<br>HTX <b>235A, 259A, 261A, 285A, 291A</b> ; DHQ <b>243A(3)</b> ; Unclass <b>209G</b> .<br>DHQ <b>223F</b> ; 5,6,8-I <b>263D</b> ; Unclass <b>231I</b> .                                                 |
|                                                         | 3 | Major<br>Minor<br>Trace | DHQ <b>219A(2)</b> .<br>HTX <b>235A, 291A</b> ; N-Me-DHQ <b>237U(2)</b> .<br>HTX <b>259A, 281A</b> ; DHQ <b>223F, 243A(2)</b> ; 4,6-Q <b>195C</b> ; 3,5-I <b>223AB(2)</b> ; 5,6,8-I <b>263D</b> ; Unclass <b>209F, 231I</b> . |
|                                                         | 4 | Major<br>Minor<br>Trace | DHQ <b>219A(3)</b> .<br>HTX <b>235A, 291A</b> ; DHQ <b>243A(3)</b> ; 4,6-Q <b>195C(2)</b> ; Unclass <b>209F, 231I</b> .<br>HTX <b>259A, 281A</b> ; DHQ <b>211A, 223F</b> ; 3,5-I <b>223AB</b> ; 5,6,8-I <b>263D</b> .         |

|                                                         |   |                         |                                                                                                                                                                                          |
|---------------------------------------------------------|---|-------------------------|------------------------------------------------------------------------------------------------------------------------------------------------------------------------------------------|
|                                                         | 5 | Major<br>Minor<br>Trace | HTX <b>291A</b> ; DHQ <b>219A</b> (2).<br>HTX <b>235A</b> , <b>259A</b> ; DHQ <b>243A</b> ; 5,6,8-I <b>263D</b> .<br>HTX <b>261A</b> , <b>281A</b> ; Unclass <b>209F</b> , <b>231J</b> . |
| <b>Varadero, Loreto</b><br><i>Ranitomeya fantastica</i> | 1 | Major<br>Minor<br>Trace | HTX <b>291A</b> .<br>HTX <b>235A</b> (2), <b>259A</b> (2), <b>285A</b> ; 5,6,8-I <b>263D</b> .<br>HTX <b>261A</b> ; DHQ <b>219A</b> , <b>223F</b> ; 5,6,8-I <b>253H</b> .                |
|                                                         | 2 | Major<br>Minor<br>Trace | HTX <b>291A</b> ; DHQ <b>223F</b> (3).<br>HTX <b>235A</b> .<br>DHQ <b>219A</b> ; 3,5-I <b>223AB</b> ; 5,6,8-I <b>253H</b> .                                                              |
|                                                         | 3 | Major<br>Minor<br>Trace | HTX <b>259A</b> , <b>285A</b> , <b>291A</b> .<br>HTX <b>235A</b> (2), <b>261A</b> .<br>HTX <b>283A</b> ; DHQ <b>219A</b> , <b>243A</b> ; 5,6,8-I <b>253H</b> .                           |
|                                                         | 4 | Major<br>Minor<br>Trace | HTX <b>235A</b> (2), <b>291A</b> .<br>DHQ <b>223F</b> (2).<br>DHQ <b>219A</b> (2); 3,5-I <b>223AB</b> ; 5,6,8-I <b>253H</b> ; Unclass <b>209F</b> .                                      |
|                                                         | 5 | Major<br>Minor<br>Trace | HTX <b>259A</b> , <b>285A</b> , <b>291A</b> ; DHQ <b>243A</b> .<br>HTX <b>235A</b> , <b>261A</b> (2).<br>DHQ <b>219A</b> (2), <b>223F</b> , <b>269B</b> ; 3,5-I <b>223AB</b> .           |

---



---

HTX (histrionicotoxin); DHQ (2,5-disubstituted decahydroquinoline); N-Me-DQH (N-methyl-decahydroquinoline); 4,6-Q (4,6-disubstituted quinolizidine); 3,5-I (3,5-disubstituted indolizidine); PTX (pumiliotoxin); DesMe PTX (desmethylpumiliotoxin); 5,8-I (5,8-disubstituted indolizidine); 5,6,8-I (5,6,8-trisubstituted indolizidine); 1,4-Q (1,4-disubstituted quinolizidine); OHQ (octahydroquinoline); Izidine (Unclassified Izidines); Unclass (Unclassified alkaloids).
